# Supplementary material for: Conserved Translatome Remodeling in Nematode Species Executing a Shared Developmental Transition
Source: PLoS Genet. 2013 Oct 3;9(10):e1003739. doi: 10.1371/journal.pgen.1003739 (PMC3789828; doi:10.1371/journal.pgen.1003739)
Supplement: Table S2 — Table of genes with high weights on the first and second principal components of PCA of RPF data from four species. (XLSX) [file pgen.1003739.s009.xlsx]

## Sheet: Sheet1
Table S2. Table of genes with high weights on the first and second principal components of PCA of RPF data from four species.
Cutoffs for genes were determined from visual inspection after plotting weights for genes on PC1 and PC2. Clusters of genes specifically characteristic to each component were readily apparent and cutoffs were assigned based on these distinctions.
Genes with high weights on PC1, low weights on PC2 (characteristic of developing samples)
Protein	Gene	Identity
CE26774	Y37E3.8	Y37E3.8
CE12920	fib-1	FIBrillarin family
CE06090	rack-1	RACK1 (mammalian Receptor of Activated C Kinase) homolog
CE33239	Y65B4BR.5	Nascent polypeptide-associated complex subunit alpha
CE09047	rpl-24.1	Ribosomal Protein, Large subunit
CE37128	K10C2.1	K10C2.1
CE00078	rpl-21	Ribosomal Protein, Large subunit
CE21681	asp-1	ASpartyl Protease
CE09041	rps-10	Ribosomal Protein, Small subunit
CE02249	iff-2	Initiation Factor Five (eIF-5A) homologs
CE26948	rps-17	Ribosomal Protein, Small subunit
CE09682	hsp-1	Heat Shock Protein
CE00821	rps-14	Ribosomal Protein, Small subunit
CE02255	rpl-5	Ribosomal Protein, Large subunit
CE03278	rpl-26	Ribosomal Protein, Large subunit
CE00450	rpl-35	Ribosomal Protein, Large subunit
CE04561	rps-8	Ribosomal Protein, Small subunit
CE09945	rps-15	Ribosomal Protein, Small subunit
CE24278	rps-4	Ribosomal Protein, Small subunit
CE20168	rpl-31	Ribosomal Protein, Large subunit
CE40119	rps-24	Ribosomal Protein, Small subunit
CE19904	rps-27	Ribosomal Protein, Small subunit
CE05598	rpl-3	Ribosomal Protein, Large subunit
CE06360	rps-5	Ribosomal Protein, Small subunit
CE16012	rps-26	Ribosomal Protein, Small subunit
CE01543	rpl-10	Ribosomal Protein, Large subunit
CE26896	rps-12	Ribosomal Protein, Small subunit
CE01810	rps-3	Ribosomal Protein, Small subunit
CE26911	rpl-34	Ribosomal Protein, Large subunit
CE21392	rpl-20	Ribosomal Protein, Large subunit
CE05656	F17C11.9	Probable elongation factor 1-gamma
CE17986	rpl-12	Ribosomal Protein, Large subunit
CE17154	K02F2.2	Adenosylhomocysteinase
CE04691	rps-25	Ribosomal Protein, Small subunit
CE13265	rps-19	Ribosomal Protein, Small subunit
CE11024	rpl-7	Ribosomal Protein, Large subunit
CE07669	rpl-4	Ribosomal Protein, Large subunit
CE08177	hsp-3	Heat Shock Protein
CE04362	rpl-33	Ribosomal Protein, Large subunit
CE08034	rpl-19	Ribosomal Protein, Large subunit
CE11344	F57F4.4	F57F4.4
CE20485	rpl-38	Ribosomal Protein, Large subunit
CE03972	pdi-2	Protein Disulfide Isomerase
CE00778	rpl-23	Ribosomal Protein, Large subunit
CE06114	K07C5.4	Uncharacterized NOP5 family protein K07C5.4
CE18478	rpl-2	Ribosomal Protein, Large subunit
CE19677	rpl-14	Ribosomal Protein, Large subunit
CE06878	rps-30	Ribosomal Protein, Small subunit
CE06313	rpl-28	Ribosomal Protein, Large subunit
CE00744	rpl-6	Ribosomal Protein, Large subunit
CE26658	rla-1	Ribosomal protein, Large subunit, Acidic (P1)
CE15495	ubq-2	UBiQuitin
CE26971	imb-3	IMportin Beta family
CE00664	rps-1	Ribosomal Protein, Small subunit
CE06577	rps-7	Ribosomal Protein, Small subunit
CE08631	hsp-6	Heat Shock Protein
CE08526	rpl-13	Ribosomal Protein, Large subunit
CE18312	W01D2.1	Ribosomal protein L37
CE21562	crt-1	CalReTiculin
CE22117	rpl-43	Ribosomal Protein, Large subunit
CE00854	rps-0	Ribosomal Protein, Small subunit
CE05849	rps-9	Ribosomal Protein, Small subunit
CE05747	rps-23	Ribosomal Protein, Small subunit
CE09655	rpa-0	Replication Protein A homolog
CE01270	eft-4	Elongation FacTor
CE01270	eft-3	Elongation FacTor
CE30781	rpl-36	Ribosomal Protein, Large subunit
CE09650	F25H2.5	Nucleoside diphosphate kinase
CE05441	daf-21	abnormal DAuer Formation
CE02131	rpl-41	Ribosomal Protein, Large subunit
CE22195	rpl-17	Ribosomal Protein, Large subunit
Genes with high weights on PC2, low weights on PC1 (characteristic of diapause samples)
Protein	Gene	Identity
CE09349	unc-54	UNCoordinated
CE07370	gpd-3	GPD (glyceraldehyde 3-phosphate dehydrogenase)
CE32326	C44B7.10	C44B7.10
CE01225	F01F1.12	Fructose-bisphosphate aldolase; Fructose-bisphosphate aldolase 2
CE27048	casy-1	CAlSYntenin/Alcadein homolog
CE08703	ost-1	OSTeonectin (SPARC) related
CE11052	pat-10	Paralysed Arrest at Two-fold
CE16577	lec-1	gaLECtin
CE00513	cts-1	CiTrate Synthase
CE07721	eat-6	EATing: abnormal pharyngeal pumping
CE28614	M01H9.3	M01H9.3
CE18020	K07E3.4	K07E3.4
CE20820	F46E10.10	Malate dehydrogenase
CE01849	lgg-1	LC3, GABARAP and GATE-16 family
CE21224	npa-1	Nematode Polyprotein Allergen related
CE20658	unc-87	UNCoordinated
CE04209	apl-1	Amyloid Precursor-Like
CE12628	hacd-1	Hydroxy-Acyl-CoA Dehydrogenase
CE01236	mlc-3	Myosin Light Chain
CE09756	acs-2	fatty Acid CoA Synthetase family
CE19022	ttr-16	TransThyretin-Related family domain
CE24078	gln-3	GLutamiNe synthetase (glutamate-ammonia ligase)
CE12212	sodh-1	SOrbitol DeHydrogenase family
CE14734	pod-2	Polarity and Osmotic sensitivity Defect
CE13150	act-2	ACTin
CE03076	C36A4.9	C36A4.9
CE41153	T01D3.3	T01D3.3
CE29809	alh-1	ALdehyde deHydrogenase
CE06200	par-5	abnormal embryonic PARtitioning of cytoplasm
CE34936	myo-3	MYOsin heavy chain structural genes
CE03389	ftt-2	Fourteen-Three-Three family
CE34063	M60.4	M60.4
CE25005	aco-2	ACOnitase
CE29443	R05G6.7	Probable voltage-dependent anion-selective channel
